# Supplementary material for: Development of a Novel Low-Calorie Lime Juice-Based Prebiotic Beverage Using a Combined Design Optimization Methodology
Source: MDPI journal article supplement (doi:10.3390/foods12030680), 2023-02-03
Supplement: s1 [file s1]

## Supporting Information

### **Development of a Novel Low-Calorie Lime Juice-Based Prebiotic Beverage Using a Combined Design Optimization Methodology**

Leila Abolghasemi Fakhri <sup>1</sup>, Babak Ghanbarzadeh <sup>1,\*</sup> and Pasquale M. Falcone <sup>2,\*</sup>

<sup>1</sup> Department of Food Science and Technology, Faculty of Agriculture, University of Tabriz,  
Tabriz P.O. Box 51666-16471, Iran

<sup>2</sup> Food and Environmental Sciences, University Polytechnical of Marche—Department of  
Agricultural, Breccia Bianche 10, 60131 Ancona, Italy

\* Correspondence: authors: ghanbarzadeh@tabrizu.ac.ir (B.G.);  
pm.falcone@univpm.it (P.M.F.)

## **Material and methods**

### **Preparation of iodine solution**

To prepare of the iodine solution, 5 g potassium iodide (KI) and 0.268 g potassium iodate (KIO<sub>3</sub>) were dissolved in 200 ml of distilled water. Then, 30 ml of 3 M sulfuric acid (H<sub>2</sub>SO<sub>4</sub>) was added and diluted with distilled water to the 500 ml solution.

### **Titrateable acidity (TA)**

The TA was determined by titrating a 10 mL sample with NaOH (0.1 N) using phenolphthalein till the sample turned light pink (pH 8.1) [1] and was calculated as [2]:

$$\%TA = \frac{V \times 0.1N \text{ NaOH} \times 0.064 \times 100}{V_s}$$

Where  $V$  is the titer volume of NaOH (ml) and  $V_s$  is the volume of the sample (ml).

Results were expressed as % citric acid in TA and °Brix in TSS.

**Table S1.** Optimization criteria and dependent variables optimization

| <b>Variables/Responses</b>        | <b>Goal</b> | <b>Lower limits</b> | <b>Upper limits</b> | <b>Weights</b> | <b>Importance</b> |
|-----------------------------------|-------------|---------------------|---------------------|----------------|-------------------|
| <b>LEO solution (0.1 v/v) (%)</b> | In range    | 0                   | 100                 | 1              | 3                 |
| <b>ME (%)</b>                     | In range    | 0                   | 100                 | 1              | 3                 |
| <b>Lutein (mg/100 ml)</b>         | In range    | 1                   | 3                   | 1              | 3                 |
| <b>Prebiotics</b>                 | In range    | Level 1             | Level 2             | 1              | 3                 |
| <b>Taste</b>                      | Maximize    | 5.25                | 7.62                | 1              | 5                 |
| <b>Flavor</b>                     | Maximize    | 5.85                | 7.92                | 1              | 5                 |
| <b>Texture</b>                    | Maximize    | 5.90                | 8.05                | 1              | 4                 |
| <b>Color</b>                      | Maximize    | 4.30                | 7.12                | 1              | 5                 |
| <b>Overall acceptance</b>         | Maximize    | 5.28                | 8.25                | 1              | 5                 |

**Table S2.** Physicochemical properties of the optimized formulations

| Optimized sample | TSS (°Brix) | pH                       | Ascorbic acid <sup>a</sup> | Titrateable acidity <sup>b</sup> |
|------------------|-------------|--------------------------|----------------------------|----------------------------------|
| Opt 1            | 1.0 ± 0.0   | 2.62 ± 0.07 <sup>a</sup> | 23.28 ± 1.54 <sup>a</sup>  | 0.56 ± 0.01 <sup>c</sup>         |
| Opt 2            | 1.0 ± 0.0   | 2.59 ± 0.03 <sup>a</sup> | 22.33 ± 1.27 <sup>a</sup>  | 0.56 ± 0.04 <sup>c</sup>         |
| Opt 3            | 3.5 ± 0.0   | 2.48 ± 0.02 <sup>b</sup> | 25.16 ± 0.64 <sup>a</sup>  | 0.60 ± 0.02 <sup>b, c</sup>      |
| Opt 4            | 3.5 ± 0.0   | 2.46 ± 0.04 <sup>b</sup> | 23.46 ± 1.65 <sup>a</sup>  | 0.64 ± 0.04 <sup>a, b</sup>      |
| Opt 5            | 3.5 ± 0.0   | 2.41 ± 0.04 <sup>b</sup> | 25.11 ± 1.92 <sup>a</sup>  | 0.65 ± 0.03 <sup>a</sup>         |
| Opt 6            | 3.5 ± 0.0   | 2.33 ± 0.03 <sup>c</sup> | 24.43 ± 1.52 <sup>a</sup>  | 0.68 ± 0.01 <sup>a</sup>         |

Data are presented as mean ± SD, n = 3.

<sup>a</sup> mg/100 g

<sup>b</sup> g of citric acid/100 ml

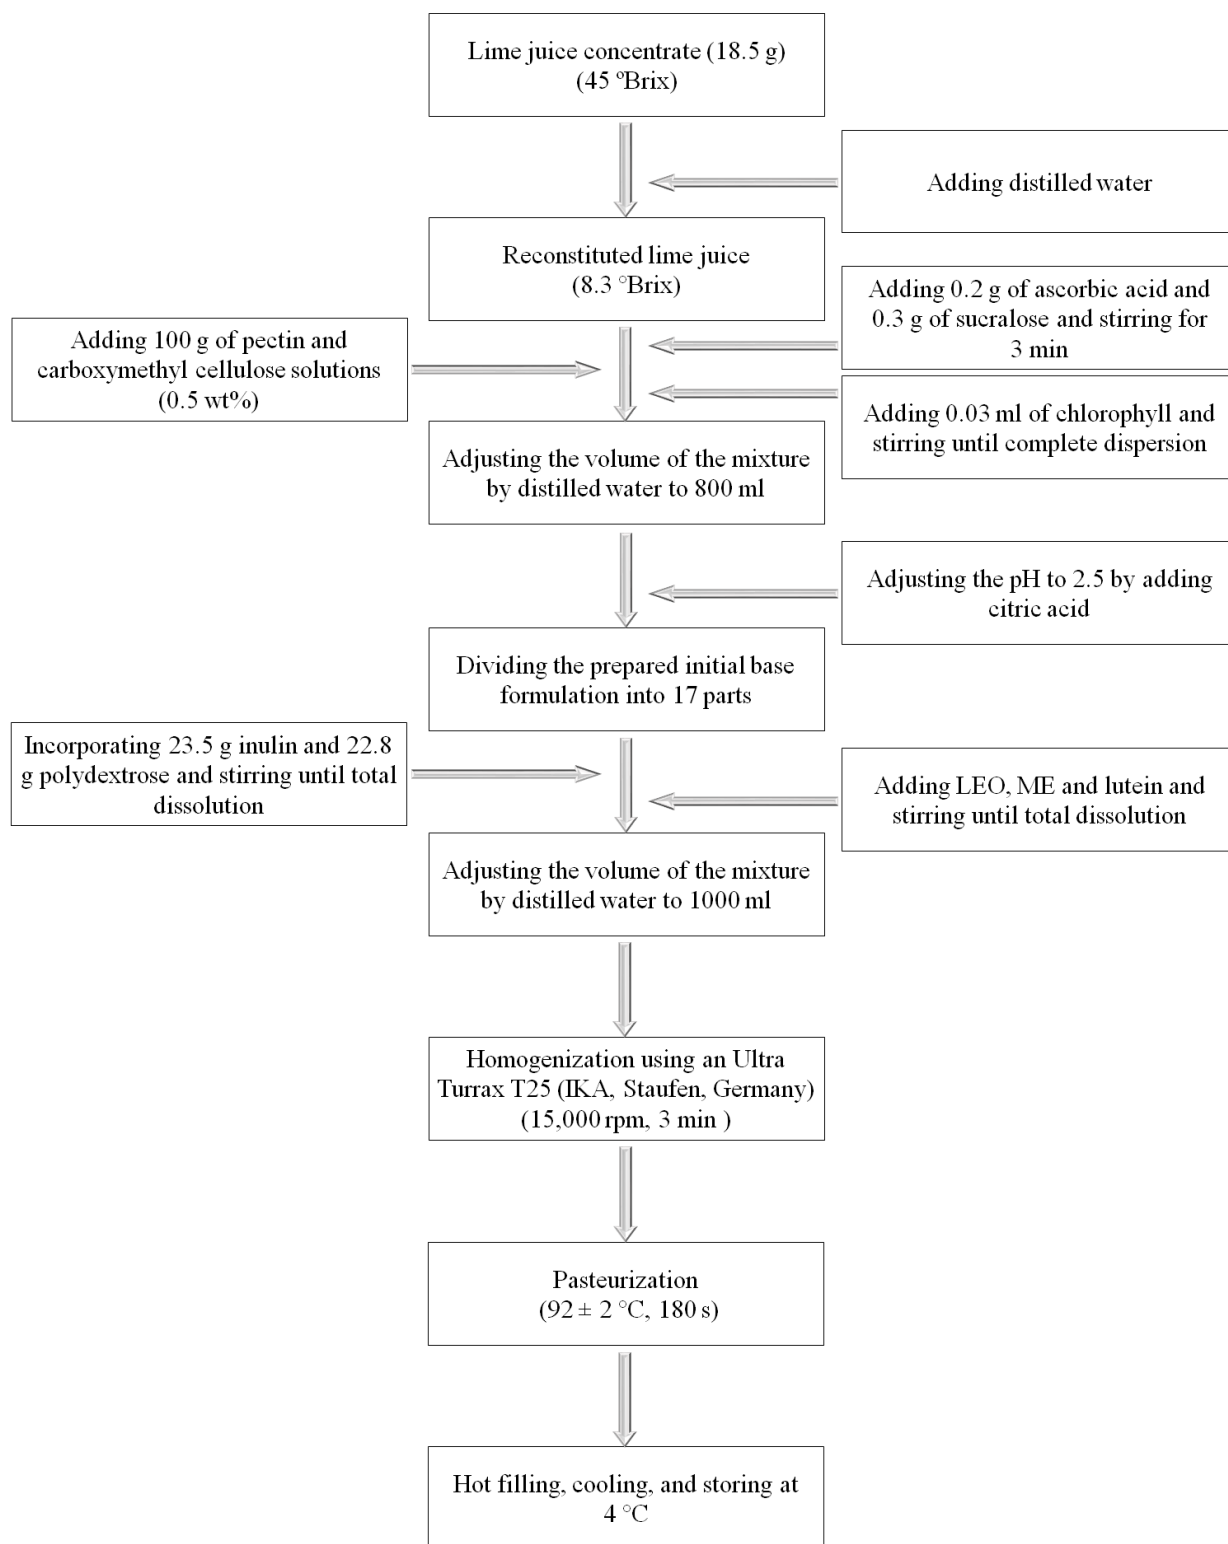

**Figure S1.** Protocol for the preparation of 1 L functional beverages in a laboratory scale. (black and white)

## References

1. AOAC. AOAC official method 942.15: Acidity (titratable) of fruit products. *Official Methods of Analysis of AOAC International* **1996**.
2. Tyl, C.; Sadler, G.D. pH and titratable acidity. In *Food analysis*, Springer: 2017; pp. 389-406.
